## **Microbiological Culture Versus 16S/18S Ribosomal RNA PCR for Infectious Keratitis:**

### **A Three-Arm Diagnostic Comparative Study**

**Running title:** Culture versus PCR for diagnosing infectious keratitis

Yasmeen Hammoudeh<sup>1</sup>, Lakshmi Suresh<sup>1</sup>, Zun Zheng Ong<sup>2</sup>, Michelle M. Lister<sup>3</sup>, Imran

Mohammed<sup>4,5</sup>, Dalia G. Said<sup>1,5</sup>, Harminder S. Dua<sup>1,5</sup>, Darren Shu Jeng Ting<sup>5,6,7</sup>

<sup>1</sup> Department of Ophthalmology, Queen's Medical Centre, Nottingham, UK.

<sup>2</sup> New Cross Hospital Eye Infirmary, Wolverhampton, UK.

<sup>3</sup> Department of Microbiology, Queen's Medical Centre, Nottingham, UK.

<sup>4</sup> School of Optometry and Vision Sciences, College of Biomedical and Life Sciences, Cardiff University, Wales.

<sup>5</sup> Academic Ophthalmology, School of Medicine, University of Nottingham, Nottingham, UK.

<sup>6</sup> Birmingham and Midland Eye Centre, Birmingham, UK.

<sup>7</sup> Academic Unit of Ophthalmology, Institute of Inflammation and Ageing, University of Birmingham, Birmingham, UK.

### **Corresponding detail:**

Dr. Darren Shu Jeng Ting

Honorary Associate Professor

Academic Ophthalmology, School of Medicine, University of Nottingham,

Nottingham, NG7 2RD, United Kingdom.

**Email:** [ting.darren@gmail.com](mailto:ting.darren@gmail.com)

**Funding / Support:** D.S.J.T. acknowledges support from the Medical Research Council /

Fight for Sight Clinical Research Fellowship (MR/T001674/1).

**Conflict of interest:** None

**Meeting presentation:** This work was presented at the Association for Research in Vision and Ophthalmology (ARVO) on 23<sup>rd</sup> April 2023 at New Orleans, USA.

## ABSTRACT

**Purpose:** To compare the diagnostic performance of microbiological culture and 16S/18S polymerase chain reaction (PCR) for infectious keratitis (IK).

**Methods:** This was a monocentric, three-arm, diagnostic comparative study. We included 81 patients (86 episodes of IK) who presented with presumed bacterial/fungal keratitis to the Queens Medical Centre, Nottingham, UK, between June 2021 and September 2022. All patients underwent simultaneous microbiological culture (either direct culture, indirect culture, or both) and 16S (pan-bacterial)/18S (pan-fungal) ribosomal RNA (rRNA) PCR-Sanger sequencing. Main outcome measures included diagnostic yield, performance, and inter-test agreement.

**Results:** All organisms identified were of bacterial origin. Diagnostic yields were similar among direct culture (52.3%), indirect culture (50.8%), and PCR (43.1%;  $p=0.13$ , Cochran's Q test). The addition of PCR enabled a positive diagnostic yield in 3 (9.7%) direct culture-negative cases. Based on composite reference standard, direct culture had the highest sensitivity (87.5%; 95% CI, 72.4-95.3%), followed by indirect culture (85.4%; 95% CI, 71.6-93.5%) and PCR (73.5%; 95% CI, 59.0-84.6%), with 100% specificity noted in all three tests. Pairwise comparisons showed substantial agreement among the three tests (percent agreement=81.8-86.2%, Cohen's  $k=0.67-0.72$ ). Clinico-microbiological correlation demonstrated higher culture-PCR concordance in cases with worse presenting visual acuity and greater severity of infection.

**Conclusion:** This study highlights a similar diagnostic performance of direct culture, indirect culture and 16S rRNA PCR for bacterial keratitis, with substantial inter-test concordance. PCR serves as a useful diagnostic adjuvant to culture, particularly in culture-negative cases or those with lesser disease severity (where culture-PCR concordance is lower).

**Keywords:** Corneal infection; Corneal ulcer; Diagnostic test; Gene sequencing; Polymerase chain reaction (PCR)

## INTRODUCTION

Infectious keratitis (IK), or commonly known as corneal infection, is the primary cause of corneal blindness globally.<sup>1</sup> Depending on the geographical and temporal variations, the incidence of IK has been estimated to be 2.5-799 cases per 100,000 people annually, with a significantly higher incidence and prevalence observed in low- and middle-income countries.<sup>1,2</sup> Timely and accurate diagnosis followed by appropriate treatment is key to achieving a good clinical outcome.<sup>3</sup> Studies have shown that visual outcome, corneal healing time and treatment success of IK are significantly influenced by the initial presenting severity of the infection.<sup>4-6</sup>

IK is primarily diagnosed on clinical grounds, supplemented by microbiological investigations and/or imaging test.<sup>3</sup> Corneal sampling for microscopy (with staining), microbiological culture and susceptibility testing are the current mainstay for IK diagnosis as it can determine the causative organisms and their antimicrobial susceptibility and/or resistance. Microbiological culture can be performed using either direct culture or indirect culture methods, with both showing similar diagnostic yields in many studies.<sup>7-10</sup> The advantage of indirect culture is that it is clinically less arduous since it only requires one sampling by the front-line ophthalmologists/doctors (instead of multiple samplings as required in direct culture). The sample is then inoculated in a transport medium for further sub-inoculation on multiple agar plates at a microbiological laboratory, making it a more efficient and practical test in a hectic clinical environment.

However, microbiological culture (in the setting of IK) is hindered by its variably low diagnostic yield due to considerably lower infectious biomass (when compared to systemic infections),<sup>11</sup> potential inadequate sampling, prior use of antimicrobials,<sup>12</sup> and poor growth of unusual pathogens (which can be further affected by a wrong choice of culture medium).<sup>3</sup> In addition, a positive culture result may take 2-3 days (and up to 14 days for some slow-growing pathogens) to become available, negatively impacting on the management of IK. As

a result, newer molecular techniques such as polymerase chain reaction (PCR) have been increasingly explored and used for diagnosing IK.<sup>3,13,14</sup>

PCR is a highly sensitive and time-efficient diagnostic test which can typically generate a positive (or negative) result within a few hours, making it an ideal diagnostic modality for IK. Among various assays and techniques, broad-range 16S/18S ribosomal RNA (rRNA)-based PCR has emerged as one of the most popular methods.<sup>3,14-16</sup> 16S rRNA is a major component of the 30S small subunit present in all prokaryotes, including bacteria. It contains multiple highly conserved regions (useful for universal PCR priming) and nine variable regions (V1-V9; pertinent for phylogenetic analysis and taxonomic resolution).<sup>17</sup> On the other hand, 18S rRNA (a core component of 40S small subunit) is highly conserved by eukaryotes, including fungi and *Acanthamoeba*, and it similarly contains nine variable regions (V1-V9).<sup>18</sup> Therefore, targeting the highly conserved, universal 16S/18S rRNA gene should theoretically identify almost any bacterial or fungal pathogens, including those that are difficult to grow in conventional culture media. In addition, PCR is able to detect microbial DNA in viable and non-viable organisms and is not affected by prior use of antimicrobials.<sup>19</sup>

In our recent 12-year Nottingham Infectious Keratitis Study,<sup>20</sup> we observed a low culture yield (37.7%) in IK. As a result, 16S/18S rRNA PCR was introduced to the local clinical care pathway in June 2021 as part of the standard IK workup to improve the diagnostic yield. To date, there were only two studies conducted in the UK specifically compared the diagnostic performance between culture and PCR for IK.<sup>14,21</sup> In view of the apparent gap in the literature, this study aimed to compare the performance among direct culture, indirect culture and 16S/18S rRNA PCR for IK and to examine the concordance among these tests.

## **METHODS**

### **Study Design**

This was a monocentric, three-arm, diagnostic accuracy comparative study. The study was approved by the clinical governance team at the Nottingham University Hospitals NHS Trust as a clinical quality improvement project (Ref: 21-135C) with an aim to improve culture yield for IK.<sup>20</sup> The study was conducted in accordance with the tenets of the Declaration of Helsinki. As corneal sampling formed part of the standard clinical care for IK, no additional informed patient consent (over and above the usual verbal consent for corneal sampling) was required. The study was reported according to the Standards for Reporting of Diagnostic Accuracy Studies (STARD) guideline for completeness and transparency.<sup>22</sup>

### **Case Identification**

Consecutive patients who presented with clinically suspected BK or FK and underwent corneal sampling for conventional microbiological culture (direct and indirect culture) and pan-bacterial (16S rRNA) / pan-fungal (18S rRNA) PCR at the Queen's Medical Centre (QMC), Nottingham, UK, were included between June 2021 and September 2022. The diagnosis of IK was made by at least one corneal consultant and/or fellow based on clinical features, microbiological results, and/or corneal imaging. In patients where repeated samplings were performed at different time points, each episode was included and analyzed separately as the primary aim of this study was to compare the diagnostic performance and agreement of the tests. Viral and Acanthamoeba keratitis cases were excluded from this study.

### **Data Collection**

All microbiological results, including culture and PCR, were collected and stored within the Nottingham local microbiological database.<sup>20,23</sup> Other relevant clinical data, including demographic factors, risk factors, clinical characteristics, corrected-distance-visual-acuity (CDVA), management, outcomes, and complications, were collected from the local

electronic health records and were collated using a standardized excel proforma for secondary analysis for any potential clinico-microbiological correlation. For patients that underwent repeated sampling, demographic and clinical data were only obtained from the first IK episode of each patient to avoid duplication. For bilateral IK cases, only one eye (i.e. the more severely affected eye) was included in this study. Similar to our previous studies,<sup>4,5</sup> the size of ulcer (including epithelial defect and infiltrate) was categorized as small (<3mm), moderate (3-6 mm), and large (>6mm), based on maximum linear dimension. The location of the ulcer was classified into peripheral (the entire ulcer was within 3 mm from the limbus), paracentral (between peripheral and central location), and central (any part of the ulcer affecting the visual axis).

### **Corneal Sampling Procedure for Culture and PCR**

As per the local departmental protocol, corneal sampling was performed when one or more of the following criteria were met: infiltrate size >1mm, centrally located ulcer, significant anterior chamber activity / hypopyon, bilateral cases, atypical presentation, or unresponsive to antimicrobial treatment.<sup>4</sup> In refractory IK cases, all antimicrobial treatment were withheld for >24 hours before corneal re-sampling was performed. In view of the low culture yield (37.7%) demonstrated in our previous study,<sup>20</sup> corneal sampling with flocked swabs (FLOQSwab, Appleton Woods Ltd, Birmingham) was introduced to replace needles/blades to improve culture and PCR yield. These flocked swabs have a perpendicularly sprayed-on nylon fiber coating at the tip, which could increase microbial uptake and release (hence a better yield).<sup>9,24</sup>

As previous studies had shown that the order of corneal sampling did not influence the diagnostic yield,<sup>9,14</sup> a standardized approach and order of corneal sampling was adopted in this study (**Figure 1**). The first corneal sampling was performed using a nylon flocked swab with subsequent inoculation in a tube containing 1 ml of modified Amies transport medium (eSwab kit, Sterilin, Appleton Woods Ltd, Birmingham). This was then utilized for

downstream indirect culture and 16S/18S PCR analysis. Four subsequent corneal samplings were performed using four single-use corneal FLOQSwabs and inoculated onto the agar plates (i.e., the direct culture method), including one chocolate agar plate, one blood agar plate, one fastidious anaerobe agar plate, and one Sabouraud dextrose agar plate.<sup>4</sup> For suspected cases of Acanthamoeba keratitis, corneal swab was obtained for Acanthamoeba DNA PCR.<sup>25</sup> However, as stated, acanthamoeba positive cases were not included in the analysis.

All corneal samples were sent to the in-house microbiological laboratory at the QMC, Nottingham, UK, for further processing. For indirect culture, 80 µl of the inoculated Amies liquid medium were obtained after vortexing the swab and liquid medium, aliquoted equally and inoculated onto four agar plates (same as the direct culture method; 20 µl per plate). All culture plates (both direct and indirect culture) were incubated for at least five days (and up to three weeks for suspected fungal keratitis) within the microbiological laboratory. Bacterial identification in cultures were confirmed by MALDI-TOF (Bruker) with a score of >2.0, indicating secure genus and probable species identification. For pan-bacterial (16S) / pan-fungal 18S rRNA PCR analysis, 500 µl was obtained from the inoculated Amies medium and was sent to an NHS-approved commercial company (Micropathology Ltd, Coventry, UK) for PCR processing and analysis.

### **Power and Sample Size Calculation**

A sample size of 78 cases was calculated based on a non-inferiority study design, assuming a 50% yield in the direct culture group and the PCR group, with a non-inferiority limit set at 20% (power=80% and  $p<0.05$ ).

### **Statistical Analysis**

Statistical analysis was conducted using SPSS v28.0 (IBM SPSS Statistics for Windows, Armonk, NY, USA). For descriptive and analytic purposes, patients were divided into

microbiological-positive (i.e. patients with a positive result on any of the three tests) and microbiological-negative (i.e. patients with negative results on all three tests) groups and were analyzed for any potential clinico-microbiological correlation. 16S/18S rRNA PCR and indirect culture were the primary and secondary index tests, respectively, whereas direct culture was the reference test. All continuous data were presented as mean  $\pm$  standard deviation (SD) and/or 95% confidence interval (CI).

The main outcome measures were the diagnostic performance (including yield, sensitivity, and specificity) and the inter-test agreement. Sensitivity and specificity of the tests were estimated using two reference standards, including direct culture alone and composite reference standard (CRS), defined as at least one positive result for any test (**Supplementary Table 1**).<sup>21</sup> Vassar Stats ([vassarstats.net](http://vassarstats.net)) was used to calculate the 95% confidence intervals (CIs) for the sensitivity and specificity of each test. Cochran's Q test was used to compare the diagnostic performance among the three tests at the positive microbiological detection level (i.e. based on positive or negative microbiological results). Percent agreement and Cohen's kappa ( $\kappa$ ) were used to examine inter-test pairwise agreement between any two tests at the organism genus level, and  $\kappa$  was interpreted as: (1) poor: 0.00-0.20; (2) fair: 0.21-0.40; (c) moderate: 0.41-0.60; (d) substantial: 0.61-0.80; and (e) almost perfect: 0.81-1.00.<sup>26,27</sup> In addition, potential influencing clinical factors on inter-test agreement (for microbiological-positive cases) between direct culture and PCR was also analyzed. A p-value of  $<0.05$  was considered statistically significant.

## RESULTS

### Patient and Clinical Characteristics

A total of 81 patients (with 86 IK episodes) were included (**Figure 2**). The mean patient age was  $49.8 \pm 22.7$  years, and 41 (50.6%) patients were female. Of the 81 patients, four underwent repeated sampling, one of which had two repeated samplings. Overall, 47 (58.0%) and 34 (42.0%) patients were microbiological-positive and microbiological-negative,



respectively. Similar demographic factors and clinical characteristics were observed in both microbiological-positive and microbiological-negative groups [all p-values >0.05, except for the presence of hypopyon ( $p=0.04$ ); **Table 1**]. Contact lens wear (43, 53.1%), ocular surface disease (34, 42.0%), and use of topical steroids (14, 17.3%) were the three most common risk factors. The mean presenting CDVA was  $0.93 \pm 0.93$  logMAR. The majority of the ulcers were of small epithelial defect size (48, 59.3%), small infiltrate size (51, 63.0%), paracentrally located (37, 45.7%), and absence of hypopyon (65, 80.2%).

### **Diagnostic Yield and Causative Organisms**

Of the 86 included cases, 66 (76.7%), 85 (98.8%), and 86 (100.0%) cases underwent direct culture, indirect culture, and PCR, with 65 (75.6%) cases having had all three tests performed. The diagnostic yield for direct culture, indirect culture and PCR was 53.0%, 48.2%, and 41.9%, respectively. When considering only cases that were investigated by all three tests ( $n=65$ ), the diagnostic yield changed slightly to 52.3% (34/65), 50.8% (33/65), and 43.1% (28/65) for direct culture, indirect culture, and PCR (**Figure 3**), with no significant difference among the tests (Cochran's Q test,  $p=0.13$ ). The addition of PCR improve the positive detection in 3 (9.7%) of the 31 direct culture-negative cases, 3 (6.8%) of the 44 indirect culture-negative cases, 3 (4.6%) of the 65 cases that had all three tests done.

A total of 66 causative organisms (all bacteria and no fungus) were identified (**Table 2**). Coagulase-negative staphylococci (15, 22.7%), *Pseudomonas aeruginosa* (14, 21.2%), and *Propionibacterium spp.* (13, 19.7%) were the most common organisms isolated. PCR detected 36 organisms, including three organisms that were not identified on either direct or indirect culture, namely *Acinetobacter spp.*, *Bacillus spp.*, and *Staphylococcus capitis* (a type of CoNS). There was a significantly lower proportion of *Propionibacterium spp.* identified in the PCR group (2.8% of all organisms) when compared to the direct culture (12.2%) and indirect culture (22.2%) groups ( $p=0.030$ ). There were 14 (17.3%) cases of polymicrobial infection when the results of all three tests were considered together.

Seven (8.1%) cases were associated with the use of topical antimicrobial treatment (mainly chloramphenicol) before corneal sampling. A causative organism was identified in two (28.6%) of the cases, including a case of *P. aeruginosa* (positive on all three methods) and a case of *Propionibacterium spp.* (only positive on indirect culture). The remaining five cases had both negative culture and PCR results, suggesting similar diagnostic performance between culture and PCR in cases with prior use of antimicrobial.

## **Diagnostic Performance**

### *Direct culture reference standard*

When using direct culture as the reference standard, the sensitivity and specificity of indirect cultures (n=65) were 85.3% (95% CI 68.2-94.5%) and 87.1% (95% CI 69.2-95.8%), respectively (**Table 3** and **Figure 4**). On the other hand, the sensitivity and specificity of 16S/18S rRNA PCR (n=66) were 74.3% (95% CI 56.4-86.9%) and 90.3% (95% CI 73.1-97.5%), respectively (**Table 3** and **Figure 4**).

### *Composite reference standard (CRS)*

Based on the CRS, the sensitivity of direct culture (n=66), indirect culture (n=85), and PCR (n=86) was 87.5% (95% CI 72.4-95.3%), 85.4% (95% CI 71.6-93.5%), and 73.5% (95% CI 59.0-84.6%), respectively (**Table 4** and **Figure 5**). The specificity of all three tests was 100% (95% CI 84.0-100.0% for direct culture and 95% CI 88.3-100.0% for indirect culture and PCR).

## **Agreement between Microbiological Investigations**

### *At microbiological detection level*

Pairwise comparison between any two investigations at the microbiological detection level showed the greatest agreement/concordance with direct culture-indirect culture (86.2%), followed by indirect culture-PCR (85.9%) and direct culture-PCR (81.8%). Cohen's kappa

analysis showed a substantial pairwise agreement with any of the two microbiological tests (mean  $k=0.67-0.72$ ; **Table 5**).

#### *At organism's genus level*

When considering at the organism's genus level, the concordance between any two tests remained similarly good. The concordance was the greatest with direct culture-indirect culture (84.6%), followed by indirect culture-PCR (82.4%) and direct culture-PCR (77.3%).

There was a substantial agreement between direct culture-indirect culture ( $k=0.69 \pm 0.09$ ; 95% CI: 0.52-0.87), and indirect culture-PCR ( $k=0.62 \pm 0.08$ ; 95% CI: 0.46-0.79).

Comparison between direct culture and PCR showed moderate agreement ( $k=0.55 \pm 0.10$ ; 95% CI: 0.36-0.74; **Table 5**).

#### *Potential influencing factors for inter-test agreement*

Based on direct culture and PCR results in microbiological positive (either culture- or PCR-positive) IK cases, we found that culture-PCR concordance was more likely to be achieved in cases with more severe infection (**Table 6**). Culture-PCR matched cases had a worse mean presenting CDVA (1.29 logMAR vs. 0.62 logMAR;  $p=0.040$ ), larger epithelial defect ( $>3\text{mm}$ ; 74.0% vs. 36.4%;  $p=0.16$ ), larger infiltrate ( $>3\text{mm}$ ; 40.0% vs. 25.0%;  $p=0.48$ ), central location (48.0% vs. 27.3%;  $p=0.30$ ), presence of hypopyon (42.3% vs. 16.7%;  $p=0.16$ ) than culture-PCR unmatched cases, though statistical significance was not achieved in most parameters likely due to a type 2 error (i.e. small sample size).

## **DISCUSSION**

Timely diagnosis and treatment serve as the key to achieving good outcomes in IK. To overcome the inherent limitations of microbiological culture, PCR test has increasingly gained traction for diagnosing IK in recent years in view of their high sensitivity and high specificity.<sup>3</sup> So far, a wide range of PCR techniques have been described for IK, including species-specific PCR,<sup>21</sup> semi-nested/nested PCR,<sup>28</sup> touchdown PCR,<sup>29</sup> multiplex PCR,<sup>30</sup>

real-time/quantitative PCR (rt-/q-PCR),<sup>31,32</sup> and broad-range 16S/18S PCR.<sup>14,18,19,21,33,34</sup> To the best of our knowledge, this is the first study that had directly compared the performance of three different microbiological investigations, namely direct culture, indirect culture, and 16S/18S rRNA PCR, for diagnosing IK. We observed comparable diagnostic yield among all three tests (41.9-53.0%), with moderate-to-substantial inter-test agreement between culture and PCR (especially in more severe infection cases).

So far, there were limited studies in the UK<sup>14,21</sup> and few outside the UK<sup>19,33,35,36</sup> that had evaluated the performance of culture and 16S rRNA PCR for bacterial keratitis. When compared to Somerville et al. study,<sup>14</sup> we observed a considerably higher diagnostic yield for both culture (53.0% vs. 23.0%) and PCR (41.9% vs. 26.0%) methods in our study. The discrepancy might be attributed to different proportion of patients with prior antimicrobial use, heterogeneous patient cohorts (with different presenting severity of infection), and corneal sampling techniques. There was a significantly higher use of prior antimicrobial reported in Somerville et al. study (34.0%) as opposed to our study (8.1%), which might have negatively impacted on the diagnostic yield in their study. Similar to their study, our study did not demonstrate any superiority in the diagnostic performance of PCR over culture in cases with prior antimicrobial use. Although the performance of PCR is reported to be less affected by prior use of antimicrobials than microbiological culture, the impact is not clinically insignificant, particularly when there is a long interval between antimicrobial exposure and sample collection.<sup>37,38</sup> In addition, there is a significantly lower infectious biomass in IK as opposed to systemic infection, and the constant tear drainage and increased tearing (in IK setting) might further dilute the microbial load, negatively impacting on the diagnostic yield.

Since the publication of our previous study,<sup>20,23</sup> we had also implemented further training on corneal sampling and a change in the sampling technique/instrument (from needle/blade to flocked swabs, known to improve the diagnostic yield),<sup>24,39</sup> which might have accounted for the improvement in the culture yield by 15% within our practice (from 37.7% to 53.0%). In

addition, previous studies, including our Nottingham studies, have shown that culture positivity is significantly influenced by the initial severity of the infection.<sup>4,5,40</sup> As the clinical severity of IK was not reported in Somerville et al. study, direct comparison with their study was not possible from this aspect. On the other hand, some studies have shown that PCR has a higher yield than culture/smear, which might have been due to the inclusion of fungal keratitis cases<sup>19,35</sup> and different patient cohorts.<sup>36,38</sup> Although our study was set out to include fungal keratitis cases, none of the culture or PCR yielded any fungal pathogen, limiting the interpretation of 18S rRNA PCR for diagnosing fungal keratitis. That said, the lack of false positive results and the perfect concordance between culture and 18S rRNA PCR suggests a high specificity of this test for ruling out fungal keratitis (though the sensitivity remains to be elucidated in our patient cohort).

Depending on the reference standard used (either direct culture standard or composite reference standard), 16S rRNA PCR was shown to exhibit a high sensitivity (73.5-74.3%) and specificity (90.3-100%) for diagnosing bacterial keratitis in our study. This was comparable to the findings reported in the literature, with a sensitivity of 63.6-100% and specificity of 67.5-100%.<sup>3</sup> One of the inherent issues with high sensitivity of PCR is that the test can produce false positive results as the test picks up environmental or internal contaminants (from latent host DNA).<sup>19,25,36</sup> Somerville et al.<sup>14</sup> demonstrated 16S rRNA amplicons in negative controls, highlighting the possibility of background contamination resulting in false positives. To address this issue, the PCR threshold used in this study was set at a higher level for ocular surface commensals to avoid false positive results (John Thomas, Micropathology Ltd, Coventry; personal communication). This could potentially explain the significantly lower rate of *Propionibacterium spp.* (a common ocular surface commensal) diagnosed by the PCR (2.8%) when compared to the direct and indirect culture methods (12.2-22.2%). Despite having a lowest but comparable sensitivity, 16S rRNA PCR was able to improve the diagnostic yield in direct culture-negative cases by ~10%, highlighting its adjuvant role for the diagnosis of IK. Interestingly, another UK study reported

a significantly lower sensitivity in PCR (25.0%) than microbiological culture (95.6%) for diagnosing bacterial keratitis,<sup>21</sup> potentially attributed to different patient cohort and inclusion criteria between the two studies.

In addition, we observed a very high percent agreement (>80%) between culture and PCR. Although good PCR-culture concordance (77.0-90.6%) has been previously reported,<sup>14,33</sup> low concordance has also been noted in some retrospective studies.<sup>21,41</sup> It is noteworthy to highlight that almost all studies reported test concordance in the form of percent agreement. While percent agreement serves as an easy way to interpret inter-test agreement rate, such analysis does not consider chance agreement and may erroneously overestimate inter-test agreement.<sup>27,42</sup> In view of this issue, we performed additional Cohen's *k* analysis, which showed substantial pairwise agreement on microbiological results among all three tests (mean  $k=0.67-0.72$ ). To dissect the potential reasons influencing test concordance, we further performed clinico-microbiological correlation, which showed that positive culture-PCR concordance was most likely to be achieved in more severe IK cases, corroborating the findings observed in the Shimizu et al. study.<sup>38</sup> This suggests that 16S rRNA PCR may have more additional clinical values in culture-negative IK cases or those that have lesser severity of infection where it can provide additional information that may not be detected by the culture method.

Another strength of this comparative study lies in the inclusion of an indirect culture group. The reasons for including an indirect culture group were twofold. First, we aimed to explore the diagnostic potential of indirect culture in replacing the direct culture method (which was the gold standard in our practice and many others) as indirect culture is more time-efficient since it only requires one sampling at the front-line ophthalmic setting, with further sub-inoculation being done at the microbiology laboratory. Our study demonstrated similar diagnostic performance and inter-test concordance between direct and indirect culture, supporting its potential use in a busy clinical setting. This also supports the findings of

previous similar studies.<sup>8,9</sup> Secondly, both indirect culture and PCR test were performed based on the same sample from the inoculated transport medium, allowing a direct comparison without any influence of the sampling sequence. Although a few studies have demonstrated that the sequence of sampling did not affect the diagnostic yield,<sup>14</sup> the theoretical impact and concern of having less infectious biomass in later samplings still exist. Therefore, having an indirect culture group (which utilized the same inoculated sample for PCR) addressed this issue.

One of the limitations of this study was the moderate sample size (n=86 cases), an issue that was commonly noted in many previous studies.<sup>14,19,35,36</sup> However, the positive findings observed in our study encourages further exploration in a larger-scale clinical setting. An ideal sample size would have been 428, based on 90% power and 10% non-inferiority limit. A cost-benefit analysis of PCR use in IK diagnosis would also be beneficial as earlier accurate diagnosis could improve clinical outcomes and reduce the risk of complication and need for surgical interventions. For example, Knight et al.<sup>43</sup> investigated three different PCR and culture combinations to diagnose *Enterobacteriaceae* infection and found the combination of PCR and culture to be the most cost-effective. In the future, multiplex PCR or metagenomic next generation sequencing may also further improve the diagnosis of IK, though its routine use in clinic is currently limited by the cost and the availability of technical expertise and resources.<sup>44-48</sup> However, it has also been reported that by adopting an intensive antibiotic treatment regime for sight threatening IK, the clinical outcome of culture positive and culture negative cases was not significantly different.<sup>4,49</sup> Our study observed a moderate diagnostic yield in both culture and PCR methods (ranged 40-50%), which might be related to the inclusion of less severe infection cases (~60% of the cases have an infiltrate size of <3mm).

In conclusion, this study demonstrated good diagnostic performance of all three different microbiological diagnostic modalities, namely direct culture, indirect culture and PCR. We

also highlight the potential adjuvant role of 16S rRNA PCR for bacterial keratitis, particularly in culture-negative and less severe IK cases. However, larger prospective studies and cost-benefit analysis are required to determine its routine use in clinical practice.

## REFERENCES

1. Ting DSJ, Ho CS, Deshmukh R, Said DG, Dua HS. Infectious keratitis: an update on epidemiology, causative microorganisms, risk factors, and antimicrobial resistance. *Eye (Lond)*. 2021;35(4):1084-101.
2. Stapleton F. The epidemiology of infectious keratitis. *Ocul Surf*. 2023;28:351-63.
3. Ting DSJ, Gopal BP, Deshmukh R, Seitzman GD, Said DG, Dua HS. Diagnostic armamentarium of infectious keratitis: A comprehensive review. *Ocul Surf*. 2022;23:27-39.
4. Ting DSJ, Cairns J, Gopal BP, Ho CS, Krstic L, Elsahn A, et al. Risk Factors, Clinical Outcomes, and Prognostic Factors of Bacterial Keratitis: The Nottingham Infectious Keratitis Study. *Front Med (Lausanne)*. 2021;8:715118.
5. Ting DSJ, Galal M, Kulkarni B, Elalfy MS, Lake D, Hamada S, et al. Clinical Characteristics and Outcomes of Fungal Keratitis in the United Kingdom 2011-2020: A 10-Year Study. *J Fungi (Basel)*. 2021;7(11):966.
6. Jin X, Feng J, Sun N, Jin H, Wang J, Song Z, et al. A 5-Year Retrospective Analysis of the Risk Factors, Treatment, and Prognosis of Patients With Fungal Keratitis in Heilongjiang, China. *Am J Ophthalmol*. 2022;244:48-57.
7. Kaye SB, Rao PG, Smith G, Scott JA, Hoyles S, Morton CE, et al. Simplifying Collection of Corneal Specimens in Cases of Suspected Bacterial Keratitis. *Journal of Clinical Microbiology*. 2003;41(7):3192-7.



8. McLeod SD, Kumar A, Cevallos V, Srinivasan M, Witcher JP. Reliability of Transport Medium in the Laboratory Evaluation of Corneal Ulcers. *American Journal of Ophthalmology*. 2005;140(6):1027-31.e1.
9. Pakzad-Vaezi K, Levasseur SD, Schendel S, Mark S, Mathias R, Roscoe D, et al. The Corneal Ulcer One-Touch Study: A Simplified Microbiological Specimen Collection Method. *American Journal of Ophthalmology*. 2015;159(1):37-43.e1.
10. Sagerfors S, Karakoida C, Sundqvist M, Ejdervik Lindblad B, Söderquist B. Corneal Culture in Infectious Keratitis: Effect of the Inoculation Method and Media on the Corneal Culture Outcome. *J Clin Med*. 2021;10(9):1810.
11. An N, Wang C, Dou X, Liu X, Wu J, Cheng Y. Comparison of 16S rDNA Amplicon Sequencing With the Culture Method for Diagnosing Causative Pathogens in Bacterial Corneal Infections. *Transl Vis Sci Technol*. 2022;11(2):29.
12. Gupta N, Tandon R. Investigative modalities in infectious keratitis. *Indian J Ophthalmol*. 2008;56(3):209-13.
13. Liu HY, Hopping GC, Vaidyanathan U, Ronquillo YC, Hoopes PC, Moshirfar M. Polymerase Chain Reaction and Its Application in the Diagnosis of Infectious Keratitis. *Med Hypothesis Discov Innov Ophthalmol*. 2019;8(3):152-5.
14. Somerville TF, Corless CE, Sueke H, Neal T, Kaye SB. 16S Ribosomal RNA PCR Versus Conventional Diagnostic Culture in the Investigation of Suspected Bacterial Keratitis. *Transl Vis Sci Technol*. 2020;9(13):2.
15. Chamberlain JS, Gibbs RA, Ranier JE, Nguyen PN, Caskey CT. Deletion screening of the Duchenne muscular dystrophy locus via multiplex DNA amplification. *Nucleic Acids Res*. 1988;16(23):11141-56.
16. Drevinek P, Hollweck R, Lorenz MG, Lustig M, Bjarnsholt T. Direct 16S/18S rRNA gene PCR followed by Sanger sequencing as a clinical diagnostic tool for detection of bacterial and fungal infections: a systematic review and meta-analysis. *J Clin Microbiol*. 2023;61(9):e0033823.

17. Johnson JS, Spakowicz DJ, Hong BY, Petersen LM, Demkowicz P, Chen L, et al. Evaluation of 16S rRNA gene sequencing for species and strain-level microbiome analysis. *Nat Commun*. 2019;10(1):5029.
18. Hadziavdic K, Lekang K, Lanzen A, Jonassen I, Thompson EM, Troedsson C. Characterization of the 18S rRNA gene for designing universal eukaryote specific primers. *PLoS One*. 2014;9(2):e87624.
19. Kim E, Chidambaram JD, Srinivasan M, Lalitha P, Wee D, Lietman TM, et al. Prospective comparison of microbial culture and polymerase chain reaction in the diagnosis of corneal ulcer. *Am J Ophthalmol*. 2008;146(5):714-23, 23.e1.
20. Ting DSJ, Ho CS, Cairns J, Elsahn A, Al-Aqaba M, Boswell T, et al. 12-year analysis of incidence, microbiological profiles and in vitro antimicrobial susceptibility of infectious keratitis: the Nottingham Infectious Keratitis Study. *Br J Ophthalmol*. 2021;105(3):328-33.
21. Hoffman JJ, Dart JKG, De SK, Carnt N, Cleary G, Hau S. Comparison of culture, confocal microscopy and PCR in routine hospital use for microbial keratitis diagnosis. *Eye (Lond)*. 2022;36(11):2172-8.
22. Cohen JF, Korevaar DA, Altman DG, Bruns DE, Gatsonis CA, Hooft L, et al. STARD 2015 guidelines for reporting diagnostic accuracy studies: explanation and elaboration. *BMJ Open*. 2016;6(11):e012799.
23. Ting DSJ, Ho CS, Cairns J, Gopal BP, Elsahn A, Al-Aqaba M, et al. Seasonal patterns of incidence, demographic factors and microbiological profiles of infectious keratitis: the Nottingham Infectious Keratitis Study. *Eye (Lond)*. 2021;35(9):2543-9.
24. Warnke P, Frickmann H, Ottl P, Podbielski A. Nasal screening for MRSA: different swabs--different results! *PLoS One*. 2014;9(10):e111627.
25. Wong TL, Ong ZZ, Marelli L, Pennacchi A, Lister M, Said DG, et al. False positive microbiological results in *Acanthamoeba* keratitis: the importance of clinico-microbiological correlation. *Eye (Lond)*. 2023; doi: 10.1038/s41433-023-02573-1.

26. Landis JR, Koch GG. The measurement of observer agreement for categorical data. *Biometrics*. 1977;33(1):159-74.
27. McHugh ML. Interrater reliability: the kappa statistic. *Biochem Med (Zagreb)*. 2012;22(3):276-82.
28. Behera HS, Srigyan D. Evaluation of polymerase chain reaction over routine microbial diagnosis for the diagnosis of fungal keratitis. *Optom Vis Sci*. 2021;98(3):280-4.
29. Zhao G, Zhai H, Yuan Q, Sun S, Liu T, Xie L. Rapid and sensitive diagnosis of fungal keratitis with direct PCR without template DNA extraction. *Clin Microbiol Infect*. 2014;20(10):O776-82.
30. Ferreira de Moura T, Limelette A, Arndt C, Guillard T, Andreoletti L, Denoyer A. First use of a new rapid multiplex PCR system for the microbiological diagnosis and the clinical management of severe infectious keratitis: A case report. *Am J Ophthalmol Case Rep*. 2022;27:101601.
31. Goh JWY, Harrison R, Hau S, Alexander CL, Tole DM, Avadhanam VS. Comparison of in vivo confocal microscopy, PCR and culture of corneal scrapes in the diagnosis of *Acanthamoeba* keratitis. *Cornea*. 2018;37(4):480-5.
32. Itahashi M, Higaki S, Fukuda M, Shimomura Y. Detection and quantification of pathogenic bacteria and fungi using real-time polymerase chain reaction by cycling probe in patients with corneal ulcer. *Arch Ophthalmol*. 2010;128(5):535-40.
33. Rampini SK, Bloemberg GV, Keller PM, Büchler AC, Dollenmaier G, Speck RF, et al. Broad-range 16S rRNA gene polymerase chain reaction for diagnosis of culture-negative bacterial infections. *Clin Infect Dis*. 2011;53(12):1245-51.
34. Embong Z, Wan Hitam WH, Yean CY, Rashid NH, Kamarudin B, Abidin SK, et al. Specific detection of fungal pathogens by 18S rRNA gene PCR in microbial keratitis. *BMC Ophthalmol*. 2008;8:7.
35. Eleinen KG, Mohalhal AA, Elmekawy HE, Abdalbaki AM, Sherif AM, El-Sherif RH, et al. Polymerase chain reaction-guided diagnosis of infective keratitis - a hospital-based study. *Curr Eye Res*. 2012;37(11):1005-11.

36. Panda A, Pal Singh T, Satpathy G, Wadhvani M, Monika M. Comparison of polymerase chain reaction and standard microbiological techniques in presumed bacterial corneal ulcers. *Int Ophthalmol*. 2015;35(2):159-65.
37. Harris AM, Bramley AM, Jain S, Arnold SR, Ampofo K, Self WH, et al. Influence of antibiotics on the detection of bacteria by culture-based and culture-independent diagnostic tests in patients hospitalized with community-acquired pneumonia. *Open Forum Infect Dis*. 2017;4(1):ofx014.
38. Shimizu D, Miyazaki D, Ehara F, Shimizu Y, Uotani R, Inata K, et al. Effectiveness of 16S ribosomal DNA real-time PCR and sequencing for diagnosing bacterial keratitis. *Graefes Arch Clin Exp Ophthalmol*. 2020;258(1):157-66.
39. Daley P, Castriciano S, Chernesky M, Smieja M. Comparison of flocced and rayon swabs for collection of respiratory epithelial cells from uninfected volunteers and symptomatic patients. *J Clin Microbiol*. 2006;44(6):2265-7.
40. Ung L, Wang Y, Vangel M, Davies EC, Gardiner M, Bispo PJM, et al. Validation of a Comprehensive Clinical Algorithm for the Assessment and Treatment of Microbial Keratitis. *Am J Ophthalmol*. 2020;214:97-109.
41. Tuft S, Bunce C, De S, Thomas J. Utility of investigation for suspected microbial keratitis: a diagnostic accuracy study. *Eye (Lond)*. 2023;37(3):415-20.
42. Trikalinos TA, Balion CM. Chapter 9: options for summarizing medical test performance in the absence of a "gold standard". *J Gen Intern Med*. 2012;27 Suppl 1(Suppl 1):S67-75.
43. Knight GM, Dyakova E, Mookerjee S, Davies F, Brannigan ET, Otter JA, et al. Fast and expensive (PCR) or cheap and slow (culture)? A mathematical modelling study to explore screening for carbapenem resistance in UK hospitals. *BMC Medicine*. 2018;16(1):141.
44. Ting DSJ, Chodosh J, Mehta JS. Achieving diagnostic excellence for infectious keratitis: A future roadmap. *Front Microbiol*. 2022;13:1020198.

45. An N, Wang C, Dou X, Liu X, Wu J, Cheng Y. Comparison of 16S rDNA amplicon sequencing with the culture method for diagnosing causative pathogens in bacterial corneal infections. *Transl Vis Sci Technol.* 2022;11(2):29.
46. Low L, Fuentes-Utrilla P, Hodson J, O'Neil JD, Rossiter AE, Begum G, et al. Evaluation of full-length nanopore 16S sequencing for detection of pathogens in microbial keratitis. *PeerJ.* 2021;9:e10778.
47. Seitzman GD, Hinterwirth A, Zhong L, Cummings MS, Chen C, Driver TH, et al. Metagenomic Deep Sequencing for the Diagnosis of Corneal and External Disease Infections. *Ophthalmology.* 2019;126(12):1724-6.
48. Ung L, Bispo PJM, Doan T, Van Gelder RN, Gilmore MS, Lietman T, et al. Clinical metagenomics for infectious corneal ulcers: Rags to riches? *Ocul Surf.* 2020;18(1):1-12.
49. Otri AM, Fares U, Al-Aqaba MA, Miri A, Faraj LA, Said DG, et al. Profile of sight-threatening infectious keratitis: a prospective study. *Acta Ophthalmol.* 2013;91(7):643-51.

## FIGURE LEGENDS

**Figure 1.** Flow diagram of the study, based on the Standard for Reporting Diagnostic Accuracy (STARD) guideline, comparing the diagnostic performance of 16S/18S ribosomal RNA polymerase chain reaction (PCR; index test) and direct culture (reference standard) for diagnosing presumed bacterial or fungal keratitis.

**Figure 2.** Flow diagram detailing the study methodology on the diagnostic pathway of infectious keratitis at the Queen's Medical Centre, Nottingham, UK.

**Figure 3.** Venn diagram demonstrating the number of positive cases detected on three microbiological tests, including direct culture, indirect culture, and 16S/18S rRNA polymerase (PCR).

**Figure 4.** Diagnostic performance of indirect culture and 16S/18S rRNA polymerase chain reaction (PCR), using direct culture as the reference standard.

**Figure 5.** Diagnostic performance of direct culture, indirect culture, and 16S/18S rRNA polymerase chain reaction (PCR), using composite reference standard as the reference standard.

**Table 1.** Patient and clinical characteristics of suspected bacterial or fungal keratitis at Queen's Medical Centre, Nottingham, UK, between June 2021 and September 2022.

| Parameters                          | All cases<br>(N=81)<br>N (%) | Culture/PCR<br>positive (N=47)<br>N (%) | Culture/PCR<br>negative (N=34)<br>N (%) | P-value* |
|-------------------------------------|------------------------------|-----------------------------------------|-----------------------------------------|----------|
| Age (years)                         | 49.8 ± 22.7                  | 50.3 ± 23.0                             | 48.8 ± 22.6                             | 0.77     |
| Female gender                       | 41 (50.6)                    | 24 (51.1)                               | 17 (50.0)                               | 0.92     |
| Right eye                           | 41 (50.6)                    | 26 (55.3)                               | 15 (44.1)                               | 0.32     |
| Duration of symptoms                | 4.8 ± 8.0                    | 3.9 ± 5.0                               | 6.2 ± 10.9                              | 0.21     |
| Risk factors**                      |                              |                                         |                                         | 0.28     |
| Contact lens wear                   | 43 (53.1)                    | 28 (59.6)                               | 15 (44.1)                               |          |
| Ocular surface disease              | 34 (42.0)                    | 21 (44.7)                               | 13 (38.2)                               |          |
| Topical steroids                    | 14 (17.3)                    | 11 (23.4)                               | 3 (8.8)                                 |          |
| Trauma                              | 10 (12.3)                    | 3 (6.4)                                 | 7 (20.6)                                |          |
| Prior corneal surgery               | 10 (12.3)                    | 6 (12.8)                                | 4 (11.8)                                |          |
| Systemic immunosuppression***       | 9 (11.1)                     | 6 (12.8)                                | 3 (8.8)                                 |          |
| Presenting CDVA (logMAR)            | 0.93 ± 0.93                  | 0.97 ± 0.93                             | 0.84 ± 0.91                             | 0.55     |
| Epithelial defect size <sup>#</sup> |                              |                                         |                                         | 0.12     |
| Small (<3.0mm)                      | 48 (59.3)                    | 24 (51.1)                               | 24 (70.6)                               |          |
| Moderate (3.1-6.0mm)                | 18 (22.2)                    | 13 (27.7)                               | 5 (14.7)                                |          |
| Large (>6.0mm)                      | 9 (11.1)                     | 7 (14.9)                                | 2 (5.9)                                 |          |
| Infiltrate size <sup>#</sup>        |                              |                                         |                                         | 0.13     |
| Small (<3.0mm)                      | 51 (63.0)                    | 30 (63.8)                               | 21 (61.8)                               |          |
| Moderate (3.1-6.0mm)                | 20 (24.7)                    | 10 (21.3)                               | 10 (29.4)                               |          |
| Large (>6.0mm)                      | 5 (6.2)                      | 5 (10.6)                                | 0 (0.0)                                 |          |
| Location <sup>#</sup>               |                              |                                         |                                         | 0.28     |
| Peripheral                          | 13 (16.0)                    | 5 (10.6)                                | 8 (23.5)                                |          |
| Paracentral                         | 37 (45.7)                    | 22 (46.9)                               | 15 (44.1)                               |          |
| Central                             | 28 (34.6)                    | 18 (38.3)                               | 10 (29.4)                               |          |
| Presence of hypopyon                | 16 (19.8)                    | 13 (27.7)                               | 3 (8.8)                                 |          |

PCR = 16S/18S ribosomal ribonucleic acid (rRNA) polymerase chain reaction; CDVA = Corrected-distance-visual acuity

\*Statistical comparison was made between culture/PCR-positive (patients were positive on at least one test) and culture/PCR-negative (patients were negative on all tests) cases.

\*\*Some patients have more than one risk factor.

\*\*\*Includes use of systemic immunosuppressive drugs, diabetes, and immunodeficiency.

<sup>#</sup>Some missing data on the corneal ulcer characteristics.

Continuous variables are presented as mean ± standard deviation (SD).

**Table 2.** A summary of the causative organisms isolated in patients presenting with presumed infectious keratitis.

| Organisms                     | Total*<br>(N=66)<br>N% | Direct Culture<br>(N=41)<br>N (%) | Indirect Culture<br>(N=54)<br>N (%) | PCR<br>(N=36)<br>N (%) | P-value** |
|-------------------------------|------------------------|-----------------------------------|-------------------------------------|------------------------|-----------|
| Gram-positive                 | 38 (57.6)              | 19 (46.3)                         | 32 (59.3)                           | 14 (38.9)              | 0.15      |
| CoNS                          | 15 (22.7)              | 5 (12.2)                          | 12 (22.2)                           | 7 (19.4)               | 0.45      |
| <i>Propionibacterium spp.</i> | 13 (19.7)              | 5 (12.2)                          | 12 (22.2)                           | 1 (2.8)                | 0.030     |
| <i>Staphylococcus aureus</i>  | 3 (4.6)                | 5 (12.2)                          | 3 (5.6)                             | 2 (5.6)                | 0.41      |
| <i>Streptococci spp.</i>      | 3 (4.6)                | 3 (7.3)                           | 3 (5.6)                             | 2 (5.6)                | 0.93      |
| Others <sup>§</sup>           | 4 (6.1)                | 1 (2.4)                           | 2 (3.7)                             | 2 (5.6)                | 0.77      |
| Gram-negative                 | 28 (42.4)              | 22 (53.7)                         | 22 (40.7)                           | 22 (61.1)              | 0.15      |
| <i>Pseudomonas aeruginosa</i> | 14 (21.2)              | 13 (21.7)                         | 11 (20.4)                           | 10 (27.8)              | 0.44      |
| <i>Serratia spp.</i>          | 6 (9.1)                | 3 (7.3)                           | 6 (11.1)                            | 6 (16.7)               | 0.44      |
| <i>Moraxella spp.</i>         | 4 (6.1)                | 3 (7.3)                           | 3 (5.6)                             | 3 (8.3)                | 0.87      |
| Others <sup>#</sup>           | 4 (6.1)                | 3 (7.3)                           | 2 (3.7)                             | 3 (8.3)                | 0.62      |

PCR = 16S/18S rRNA polymerase chain reaction; CoNS = Coagulase-negative Staphylococci

\*The total was based on the causative organisms isolated by all three tests. For example, if a case was positive for two different organisms on either the same or different tests, both organisms were included for that case. However, the same organism isolated by different methods in each case was considered as one organism.

\*\*Comparison of the causative organisms was made among the three test groups, based on the total organisms in each group.

<sup>§</sup>These included *Abiotrophia defectiva*, *Bacillus spp.*, and *Corynebacterium spp.*

<sup>#</sup>These included *Citrobacter koseri*, *Acinetobacter spp.*, and *Hemophilus influenzae*.



**Table 3.** Diagnostic performance of indirect culture and 16S/18S rRNA PCR against direct culture (reference standard).

|                         |       | Direct culture |            |       |
|-------------------------|-------|----------------|------------|-------|
|                         |       | P              | N          | Total |
| <b>Indirect culture</b> | P     | 29             | 4          | 33    |
|                         | N     | 5              | 27         | 32    |
|                         | Total | 34             | 31         | 65    |
| <b>Performance</b>      |       | Sn = 85.3%     | Sp = 87.1% |       |

|                    |       | Direct culture |            |       |
|--------------------|-------|----------------|------------|-------|
|                    |       | P              | N          | Total |
| <b>PCR</b>         | P     | 26             | 3          | 29    |
|                    | N     | 9              | 28         | 37    |
|                    | Total | 35             | 31         | 66    |
| <b>Performance</b> |       | Sn = 74.3%     | Sp = 90.3% |       |

P = Positive microbiological result; N = Negative microbiological result; PCR = 16S/18S rRNA polymerase chain reaction; Sn = Sensitivity; Sp = Specificity

**Table 4.** Diagnostic performance of direct culture, indirect culture, and 16S/18S rRNA PCR, based on the composite reference standard (CRS).

|             |       | CRS        |           |       |
|-------------|-------|------------|-----------|-------|
|             |       | P          | N         | Total |
| DC          | P     | 35         | 0         | 35    |
|             | N     | 5          | 26        | 31    |
|             | Total | 40         | 26        | 66    |
| Performance |       | Sn = 85.3% | Sp = 100% |       |

|             |       | CRS        |           |       |
|-------------|-------|------------|-----------|-------|
|             |       | P          | N         | Total |
| IC          | P     | 41         | 0         | 41    |
|             | N     | 7          | 37        | 44    |
|             | Total | 48         | 37        | 85    |
| Performance |       | Sn = 85.4% | Sp = 100% |       |

|             |       | CRS        |           |       |
|-------------|-------|------------|-----------|-------|
|             |       | P          | N         | Total |
| PCR         | P     | 36         | 0         | 36    |
|             | N     | 13         | 37        | 50    |
|             | Total | 49         | 37        | 86    |
| Performance |       | Sn = 73.5% | Sp = 100% |       |

DC = Direct culture; IC = Indirect culture; PCR = 16S/18S rRNA polymerase chain reaction; P = Positive microbiological result; N = Negative microbiological result; Sn = Sensitivity; Sp = Specificity

**Table 5.** Concordance between microbiological investigations for diagnosing infectious keratitis (IK).

| Comparison                                                            | Number of cases | Percent agreement, N (%) | Cohen's Kappa ( <i>k</i> ), Mean ± SE (95% CI) |
|-----------------------------------------------------------------------|-----------------|--------------------------|------------------------------------------------|
| <i>Concordance at microbiological detection level*</i>                |                 |                          |                                                |
| DC versus IC                                                          | 65              | 56 (86.2%)               | 0.72 ± 0.09 (0.55-0.89)                        |
| DC versus PCR                                                         | 66              | 54 (81.8%)               | 0.67 ± 0.09 (0.49-0.84)                        |
| IC versus PCR                                                         | 85              | 73 (85.9%)               | 0.69 ± 0.08 (0.54-0.84)                        |
| <i>Concordance at organism genus level (in positive cases only)**</i> |                 |                          |                                                |
| DC versus IC                                                          | 65              | 55 (84.6%)               | 0.69 ± 0.09 (0.52-0.87)                        |
| DC versus PCR                                                         | 66              | 51 (77.3%)               | 0.55 ± 0.10 (0.36-0.74)                        |
| IC versus PCR                                                         | 85              | 70 (82.4%)               | 0.62 ± 0.08 (0.46-0.79)                        |

DC = Direct culture; IC = Indirect culture; PCR = 16S/18S rRNA polymerase chain reaction; CI = Confidence interval

\*Concordance is considered based on the microbiological detection result (i.e. positive or negative test result). Concordance is achieved if detection was positive on positive on both tests, regardless of the causative organism(s).

\*\*Concordance is considered based on the organism's genus result. Concordance is achieved if the same organism (at least one) is isolated by both comparing techniques.

**Table 6.** Examination of potential factors influencing the concordance between direct culture and 16S/18S rRNA PCR results in culture- or PCR-positive infectious keratitis (IK).

| Parameters                              | All cases (N=38)<br>N (%) | Culture-PCR<br>matched (N=26)<br>N (%) | Culture-PCR<br>unmatched (N=12)<br>N (%) | P-value* |
|-----------------------------------------|---------------------------|----------------------------------------|------------------------------------------|----------|
| Age (years)                             | 52.3 ± 21.5               | 53.3 ± 20.4                            | 50.2 ± 24.7                              | 0.71     |
| Female gender                           | 20 (52.6)                 | 14 (53.8)                              | 6 (50.0)                                 | 1.0      |
| Right eye                               | 20 (52.6)                 | 15 (57.7)                              | 5 (41.7)                                 | 0.49     |
| Duration of symptoms, days              | 5 ± 9.1                   | 5 ± 11.0                               | 3 ± 2.6                                  | 0.41     |
| Presenting CDVA, logMAR                 | 1.08 ± 1.03               | 1.29 ± 1.06                            | 0.62 ± 0.81                              | 0.040    |
| Epithelial defect size, mm <sup>§</sup> |                           |                                        |                                          | 0.16     |
| Small (≤3.0)                            | 16 (44.4)                 | 9 (36.0)                               | 7 (63.6)                                 |          |
| Moderate/large (>3.0)                   | 20 (55.6)                 | 16 (74.0)                              | 4 (36.4)                                 |          |
| Infiltrate size, mm <sup>§</sup>        |                           |                                        |                                          | 0.48     |
| Small (≤3.0)                            | 24 (63.2)                 | 15 (60.0)                              | 9 (75.0)                                 |          |
| Moderate/large (>3.0)                   | 13 (36.8)                 | 10 (40.0)                              | 3 (25.0)                                 |          |
| Location <sup>§</sup>                   |                           |                                        |                                          | 0.30     |
| Peripheral/paracentral                  | 21 (58.3)                 | 13 (52.0)                              | 8 (72.7)                                 |          |
| Central                                 | 15 (41.7)                 | 12 (48.0)                              | 3 (27.3)                                 |          |
| Presence of hypopyon                    | 13 (34.2)                 | 11 (42.3)                              | 2 (16.7)                                 | 0.16     |

\*Comparison was made between culture-PCR matched and unmatched groups, using unpaired T-test (for continuous variables) and Chi-square or Fisher exact test (for categorical variables where appropriate).

<sup>§</sup>A few missing data on the corneal ulcer characteristics.



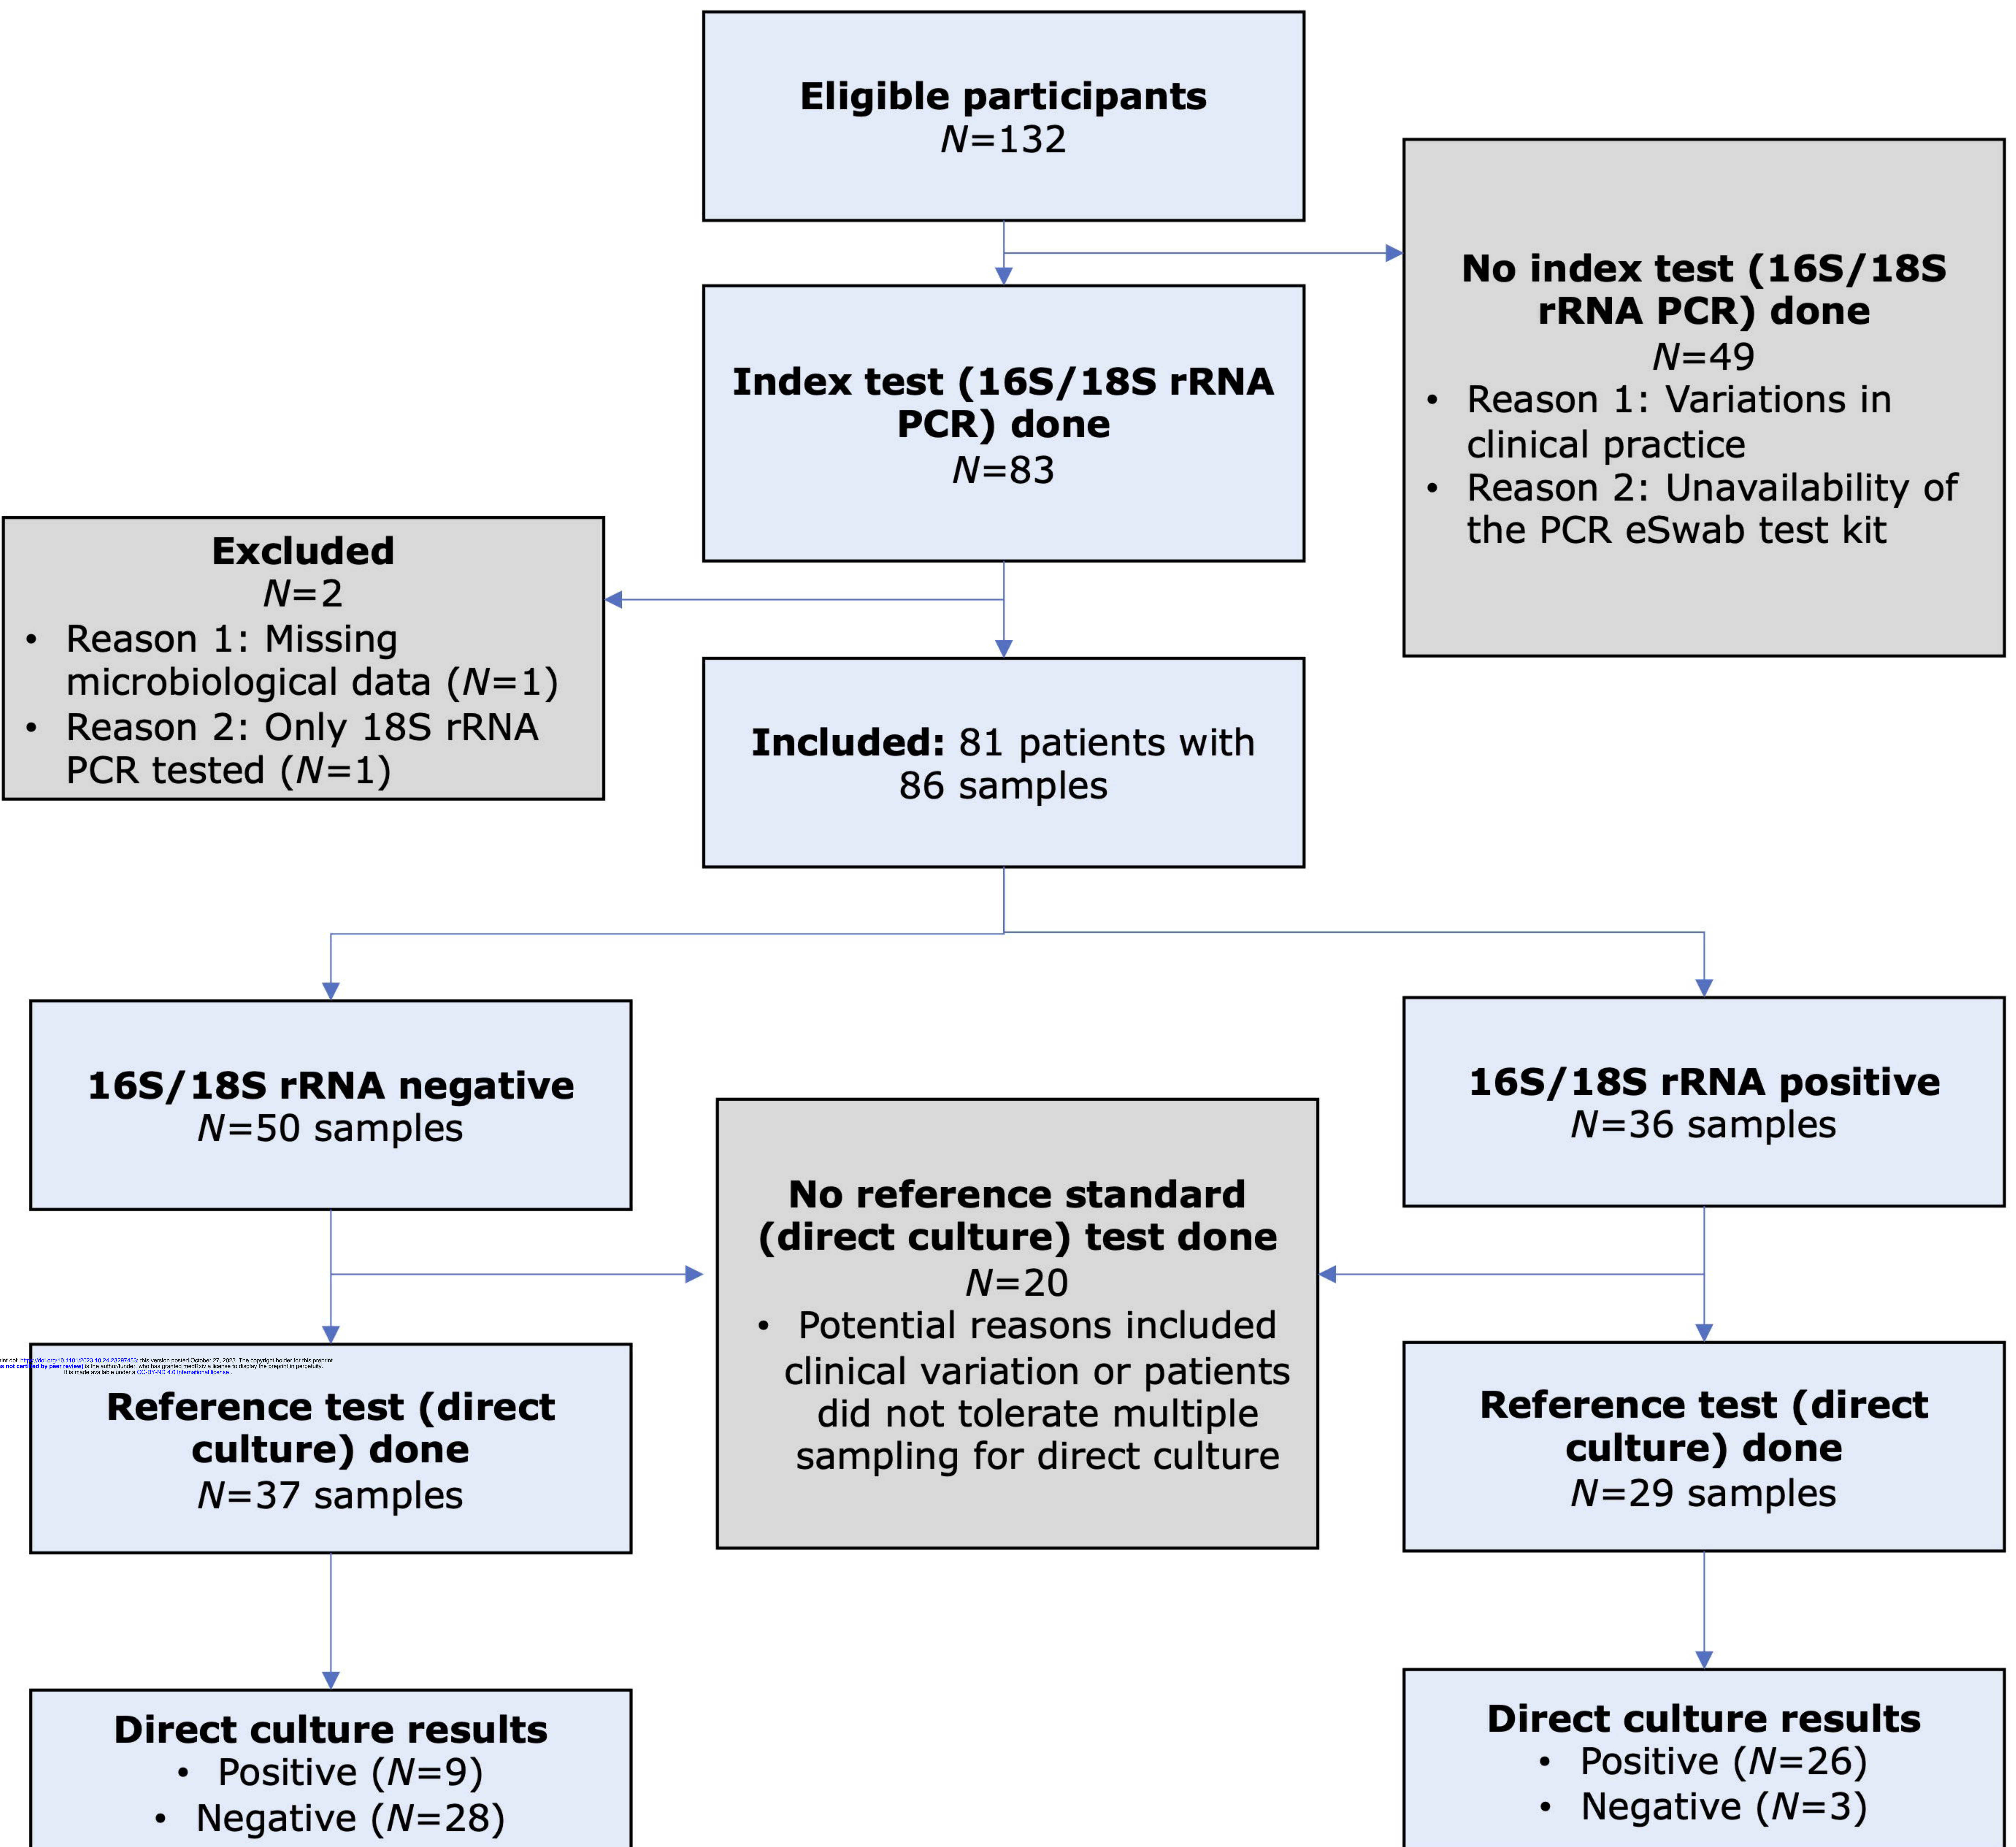



Patients with suspected infectious keratitis

Met local corneal sampling guidelines (at least one of the features listed)

Did not meet corneal sampling guidelines

Firstly, a corneal sample was obtained using an eSwab, which was then inoculated in 1mL of Amies transport medium and sent to the microbiology department for processing.\*

Secondly, additional four corneal samples for direct culture were collected using FLOQSwabs, which were streaked directly onto four solid agar plates:

- Chocolate agar
- Blood agar
- Fastidious anaerobe agar
- Sabouraud dextrose agar

Standard imaging of the corneal surface:

- Slit lamp biomicroscopy (diffuse, slit-beam, and fluorescein staining)
- Anterior segment optical coherence tomography
  - In vivo confocal microscopy (if indicated)

500 microlitres of the sample were sent to Micropathology Ltd, Coventry, UK, for 16S/18S ribosomal RNA PCR processing and analysis

80 microlitres (20 microlitres per plate) were inoculated indirectly onto four solid agar plates:

- Chocolate agar
- Blood agar
- Fastidious anaerobe agar
- Sabouraud dextrose agar

Incubated plates at appropriate temperatures for up to 3 weeks (if fungus suspected)

Colony growth seen on plates

No growth seen on plates

Identified isolated organisms using standard culture and bacteriology tests. Antimicrobial susceptibility testing was done using standard disc diffusion assay or Microscan.

Negative result reported

\*For cases of suspected Acanthamoeba keratitis, an additional dry swab was used to sample the cornea and was sent for PCR.

medRxiv preprint doi: <https://doi.org/10.1101/2023.10.24.23297453>; this version posted October 27, 2023. The copyright holder for this preprint (which was not certified by peer review) is the author/funder, who has granted medRxiv a license to display the preprint in perpetuity. It is made available under aCC-BY 4.0 International license.



**16S/18S  
rRNA PCR**

1

1

2

24

4

5

2

**Direct  
culture**

**Indirect  
culture**

**N=26**

Cases (including  
resampling) with all three  
tests done (N=65)

Positive direct culture  
(N=34)

Positive indirect culture  
(N=33)

Positive 16S/18S rRNA  
PCR (N=28)

Negative culture/PCR  
(N=26)



# Diagnostic performance of microbiological tests

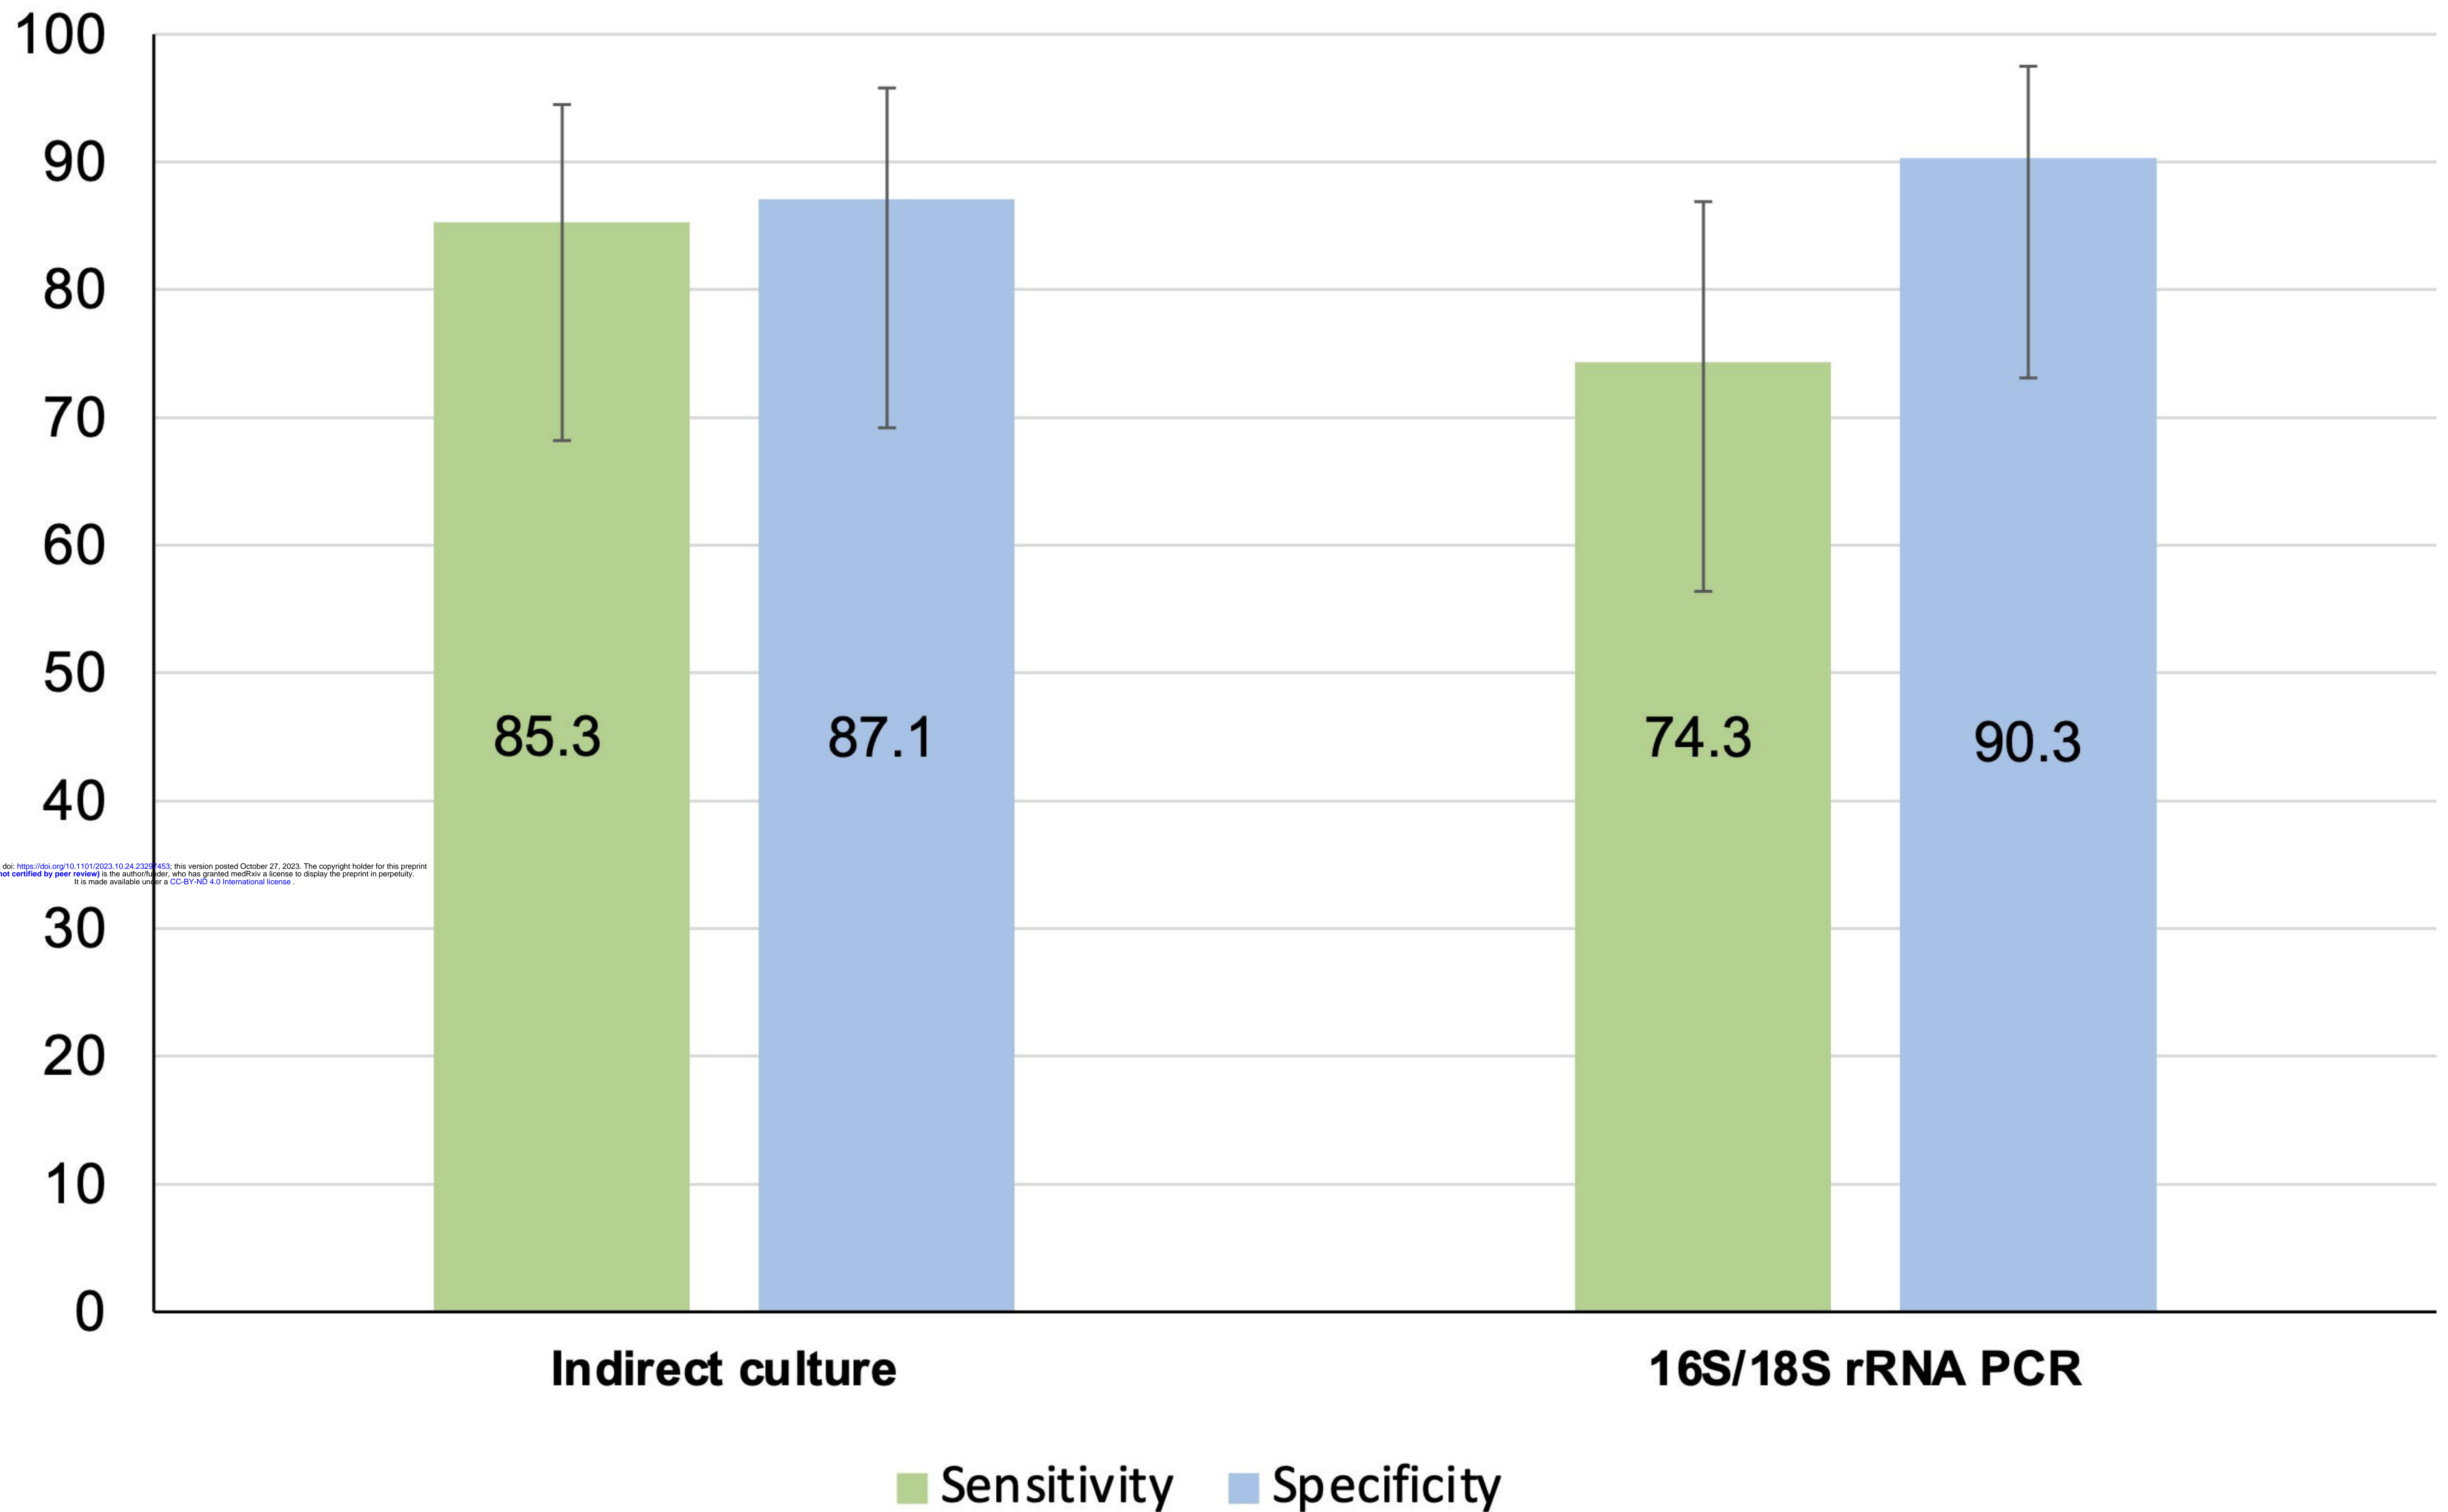



# Diagnostic performance of microbiological tests

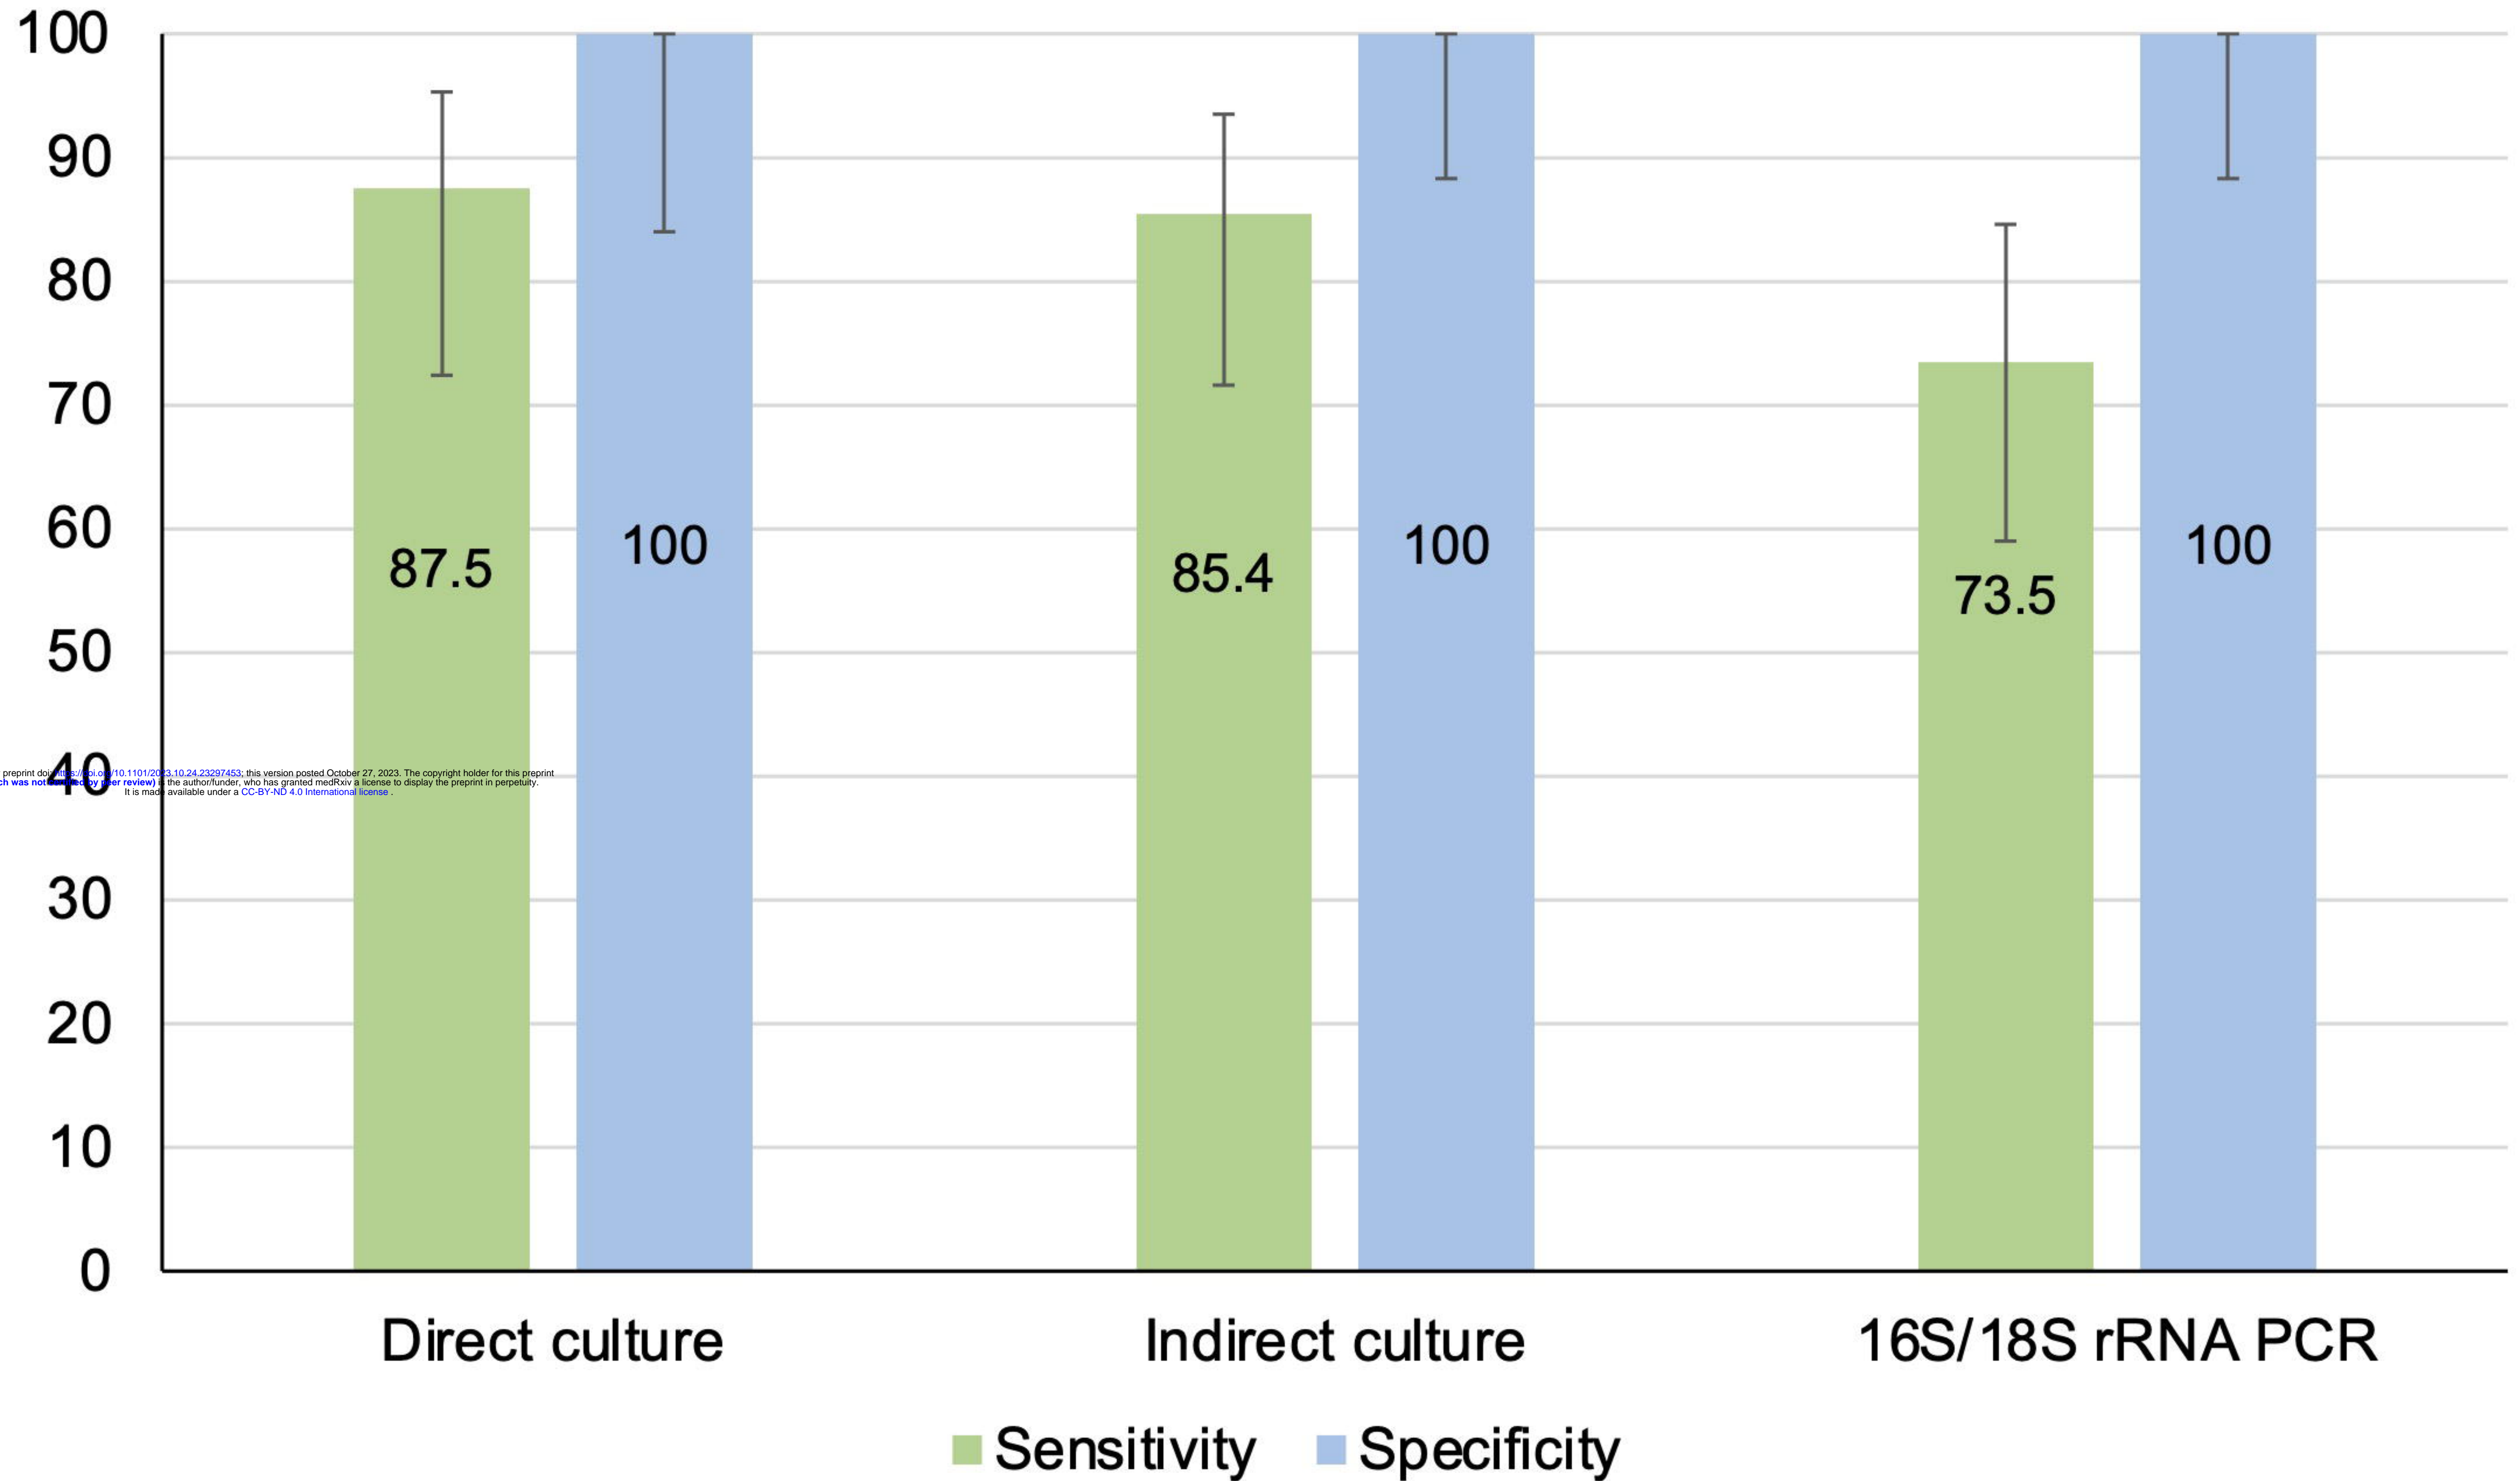

Source: https://medrxiv.org/content/medrxiv/early/2023/10/27/2023.10.24.23297453.full.pdf
